# Supplementary material for: Personality Profile in Focal Hand Dystonia: A Cross-Sectional Study
Source: MDPI journal article supplement (doi:10.3390/ijerph18157863), 2021-07-25
Supplement: s1 [file s1]

# Supplementary Materials

**Table S1.** Descriptive results of manual dexterity measures; Focal Hand Dystonia (n = 12) and No Dystonia (n = 12).

| QuickDASH                                  | Distonía (n = 12)   | No distonía (n = 12) |
|--------------------------------------------|---------------------|----------------------|
|                                            | 24.03 ± 23          | 3.18 ± 4.36          |
| <b>Jebsen Taylor Test of Hand Function</b> |                     |                      |
| JTTHF_1_D, mediana (q1–q3)                 | 19.93 (13.04–44.88) | 10.08 (9.50–12.83)   |
| JTTHF_1_ND, media (DE))                    | 38.31 (16.33)       | 30.08 (12.50)        |
| JTTHF_2_D, mediana (q1–q3)                 | 5.04 (4.31–6.97)    | 3.67 (3.39–4.09)     |
| JTTHF_2_ND, mediana (q1–q3)                | 5 (3.85–6.17)       | 4.07 (3.63–4.65)     |
| JTTHF_3_D, media (DE)                      | 6.63 (1.24)         | 6.67 (2.32)          |
| JTTHF_3_ND, mediana (q1–q3)                | 6.91 (6.25–7.79)    | 5.99 (5.83–6.58)     |
| JTTHF_4_D, mediana (q1–q3)                 | 7.28 (5.79–15.05)   | 7 (5.12–9.78)        |
| JTTHF_4_ND, media (DE)                     | 9.96 (1.69)         | 10.22 (3.98)         |
| JTTHF_5_D, mediana (q1–q3)                 | 2.65 (1.84–5.32)    | 1.94 (1.55–2.30)     |
| JTTHF_5_ND, mediana (q1–q3)                | 2.92 (2.42–4.53)    | 2.19 (1.74–3.07)     |
| JTTHF_6_D, mediana (q1–q3)                 | 3.88 (3.41–5.10)    | 3.26 (2.67–3.57)     |
| JTTHF_6_ND, mediana (q1–q3)                | 4.07 (3.54–4.46)    | 3.50 (3.22–3.91)     |
| JTTHF_7_D, mediana (q1–q3)                 | 3.44 (3.08–4.61)    | 3.38 (2.71–3.71)     |
| JTTHF_7_ND, mediana (q1–q3)                | 3.65 (3.30–4.22)    | 3.52 (2.90–4.04)     |

NOTE: JTTHF\_1\_D: Jebsen-Taylor Hand Function Test, dominant side writing; JTTHF\_1\_ND: Jebsen-Taylor Hand Function Test non-dominant side writing; JTTHF\_2\_D: Jebsen-Taylor Hand Function Test, pass leaves dominant side; JTTHF\_2\_ND: Jebsen-Taylor Hand Function Test, pass leaves non-dominant side; JTTHF\_3\_D: Jebsen-Taylor Hand Function Test, small objects dominant side; JTTHF\_3\_ND: Jebsen-Taylor Hand Function Test, small objects non-dominant side; JTTHF\_4\_D: Jebsen-Taylor Hand Function Test, similar power supply dominant side; JTTHF\_4\_ND: Jebsen-Taylor Hand Function Test similar power supply non-dominant side; JTTHF\_5\_D: Jebsen-Taylor Hand Function Test, stacking chips on dominant side; JTTHF\_5\_ND: Jebsen-Taylor Hand Function Test, stacking chips on non-dominant side; JTTHF\_6\_D: Jebsen-Taylor Hand Function Test, move light objects dominant side; JTTHF\_6\_ND: Jebsen-Taylor Hand Function Test, move light objects non-dominant side; JTTHF\_7\_D: Jebsen-Taylor Hand Function Test, move heavy objects dominant side; JTTHF\_7\_ND: Jebsen-Taylor Hand Function Test, move heavy objects non-dominant side.

**Table S2.** correlations between different personality profiles, functionality of the upper limb and the perception of participation in activities of daily living.

|            | BFQ<br>Extraversion     | BFQ<br>Agreeableness    | BFQ<br>Conscientiousness | BFQ_<br>Emotional<br>Stability | BFQ_<br>Openness        | QuickDASH               |
|------------|-------------------------|-------------------------|--------------------------|--------------------------------|-------------------------|-------------------------|
| JTHFT_1_ND | r = -.122<br>p = 0.544  | r = -0.189<br>p = 0.344 | r = 0.058<br>p = 0.774   | r = -0.418<br>p = 0.030        | r = -0.319<br>p = 0.104 | r = 0.598<br>p = 0.001  |
| JTHFT_1_D  | r = -0.191<br>p = 0.340 | r = -0.241<br>p = 0.226 | r = -0.016<br>p = 0.938  | r = -.374<br>p = 0.054         | r = -0.424<br>p = 0.028 | r = 0.557<br>p = 0.003  |
| JTHFT_2_ND | r = -0.200<br>p = 0.318 | r = -0.477<br>p = 0.012 | r = -0.300<br>p = 0.129  | r = -0.284<br>p = 0.151        | r = -0.315<br>p = 0.109 | r = 0.258<br>p = 0.194  |
| JTHFT_2_D  | r = -0.161<br>p = 0.421 | r = -0.405<br>p = 0.036 | r = -0.185<br>p = 0.355  | r = -0.261<br>p = 0.189        | r = -0.211<br>p = 0.292 | r = 0.298<br>p = 0.132  |
| JTHFT_3_ND | r = -0.024<br>p = 0.904 | r = -0.447<br>p = 0.019 | r = -0.017<br>p = 0.935  | r = -0.413<br>p = 0.032        | r = -0.075<br>p = 0.708 | r = 0.391<br>p = 0.044  |
| JTHFT_3_D  | r = 0.165<br>p = 0.409  | r = -0.230<br>p = 0.249 | r = 0.177<br>p = 0.377   | r = -0.046<br>p = 0.821        | r = 0.324<br>p = 0.099  | r = 0.073<br>p = 0.716  |
| JTHFT_4_ND | r = -0.363<br>p = 0.063 | r = -0.243<br>p = 0.222 | r = -0.315<br>p = 0.109  | r = 0.087<br>p = 0.666         | r = -0.243<br>p = 0.222 | r = -0.034<br>p = 0.867 |
| JTHFT_4_D  | r = -0.141<br>p = 0.483 | r = -0.229<br>p = 0.252 | r = -0.373<br>p = 0.055  | r = -0.038<br>p = 0.851        | r = -0.185<br>p = 0.356 | r = -0.061<br>p = 0.761 |
| JTHFT_5_ND | r = -0.018<br>p = 0.928 | r = -0.201<br>p = 0.315 | r = 0.155<br>p = 0.439   | r = -0.248<br>p = 0.212        | r = -0.023<br>p = 0.909 | r = 0.201<br>p = 0.316  |
| JTHFT_5_D  | r = -0.217<br>p = 0.278 | r = -0.215<br>p = 0.282 | r = 0.207<br>p = 0.300   | r = -0.118<br>p = 0.557        | r = 0.129<br>p = 0.521  | r = 0.377<br>p = 0.052  |
| JTHFT_6_ND | r = -0.310<br>p = 0.115 | r = -0.076<br>p = 0.705 | r = -0.224<br>p = 0.261  | r = -0.386<br>p = 0.047        | r = 0.010<br>p = 0.962  | r = 0.305<br>p = 0.122  |
| JTHFT_6_D  | r = -0.296<br>p = 0.134 | r = -0.268<br>p = 0.176 | r = -0.029<br>p = 0.886  | r = -0.279<br>p = 0.159        | r = -0.045<br>p = 0.822 | r = 0.446<br>p = 0.020  |
| JTHFT_7_ND | r = -0.302<br>p = 0.126 | r = -0.180<br>p = 0.369 | r = 0.022<br>p = 0.912   | r = -0.246<br>p = 0.216        | r = 0.106<br>p = 0.598  | r = 0.215<br>p = 0.282  |
| JTHFT_7_D  | r = -0.308<br>p = 0.118 | r = -0.297<br>p = 0.133 | r = -0.010<br>p = 0.959  | r = -0.331<br>p = 0.091        | r = 0.025<br>p = 0.903  | r = 0.263<br>p = 0.184  |

NOTE: JTTHF\_1\_D: Jebsen-Taylor Hand Function Test, dominant side writing; JTTHF\_1\_ND: Jebsen-Taylor Hand Function Test non-dominant side writing; JTTHF\_2\_D: Jebsen-Taylor Hand Function Test, pass leaves dominant side; JTTHF\_2\_ND: Jebsen-Taylor Hand Function Test, pass leaves non-dominant side; JTTHF\_3\_D: Jebsen-Taylor Hand Function Test, small objects dominant side; JTTHF\_3\_ND: Jebsen-Taylor Hand Function Test, small objects non-dominant side; JTTHF\_4\_D: Jebsen-Taylor Hand Function Test, similar power supply dominant side; JTTHF\_4\_ND: Jebsen-Taylor Hand Function Test similar power supply non-dominant side; JTTHF\_5\_D: Jebsen-Taylor Hand Function Test, stacking chips on dominant side; JTTHF\_5\_ND: Jebsen-Taylor Hand Function Test, stacking chips on non-dominant side; JTTHF\_6\_D: Jebsen-Taylor Hand Function Test, move light objects dominant side; JTTHF\_6\_ND: Jebsen-Taylor Hand Function Test, move light objects non-dominant side; JTTHF\_7\_D: Jebsen-Taylor Hand Function Test, move heavy objects dominant side; JTTHF\_7\_ND: Jebsen-Taylor Hand Function Test, move heavy objects non-dominant side.
